# Supplementary material for: Rapid resensitization of ASIC2a is conferred by three amino acid residues in the N terminus
Source: PubMed Central journal article supplement — J Gen Physiol. 2019 Apr 22;151(7):944–53. doi: 10.1085/jgp.201812224 (PMC6605689; doi:10.1085/jgp.201812224), 2019-04-22
Supplement: JGP_201812224_sm.pdf [file JGP_201812224_sm.pdf]

## Supplemental material

Lee et al., <https://doi.org/10.1085/jgp.201812224>

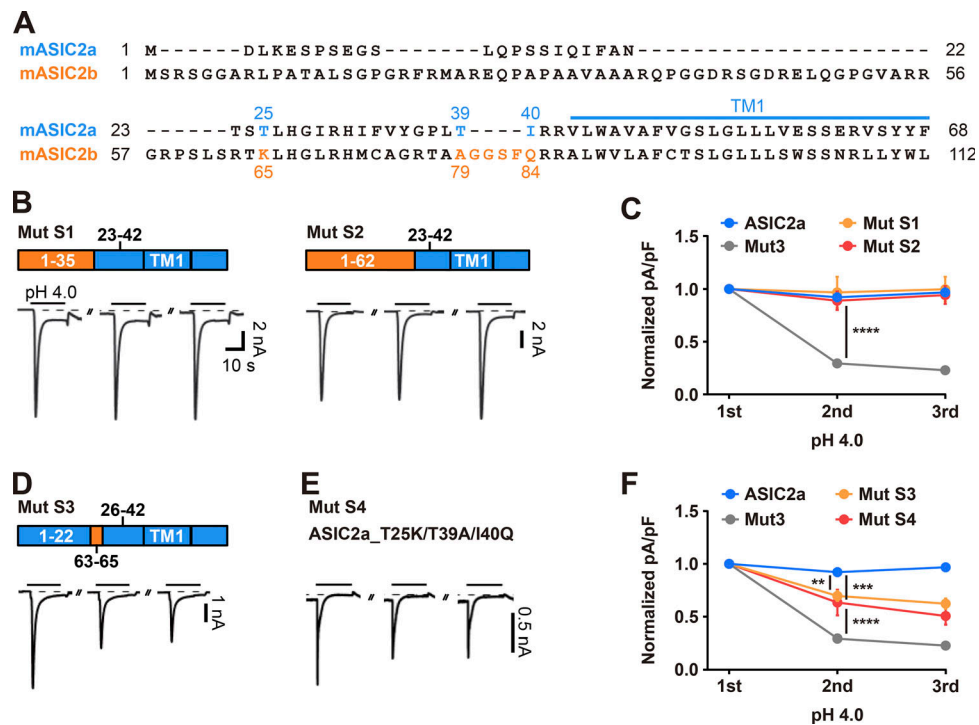

Figure S1. **The responses of ASIC2a mutants to three consecutive pH 4.0 treatments.** (A) Alignment of amino acid sequences of ASIC2a (1–68) and ASIC2b (1–112). (B, D, and E) Currents elicited by three consecutive treatments of pH 4.0 with a 2-min interval in HEK293T cells expressing the indicated mutant. Acidic stimuli were delivered by switching the bath solution from pH 7.4 to pH 4.0. (C and F) Peak current densities elicited by three successive acidic stimuli, normalized to those evoked by the first stimulus.  $n = 5$  for each group. \*\*,  $P < 0.01$ ; \*\*\*,  $P < 0.001$ ; \*\*\*\*,  $P < 0.0001$ , two-way ANOVA followed by Tukey's multiple comparisons corrections.

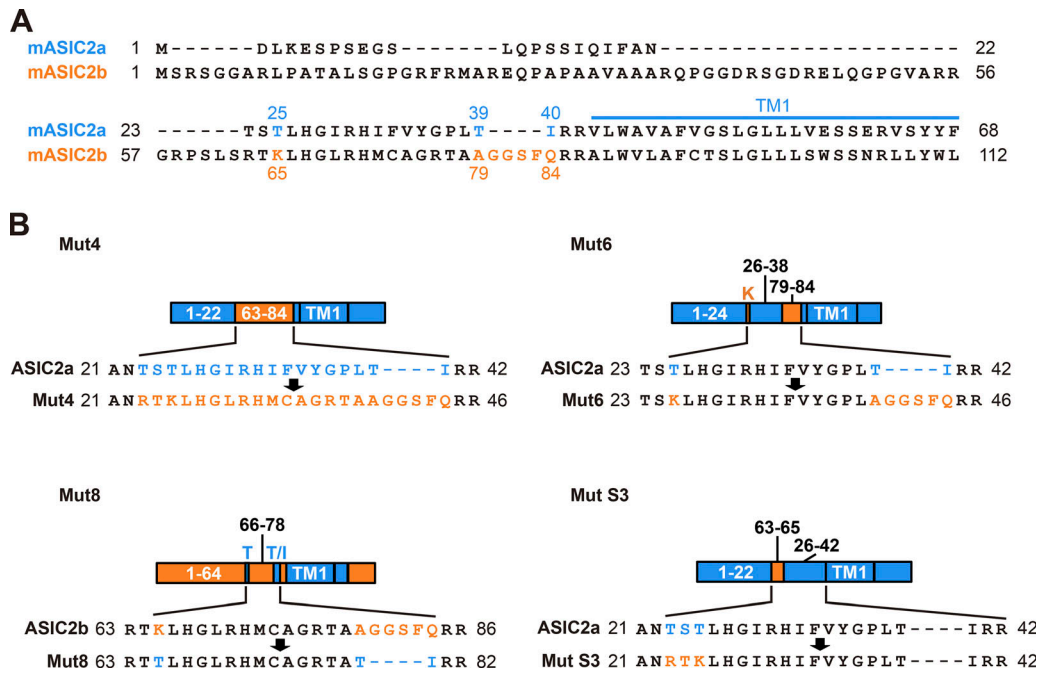

Figure S2. **The schematics and amino acid sequences of ASIC2a mutants. (A)** Alignment of amino acid sequences of ASIC2a (1–68) and ASIC2b (1–112). **(B)** Schematic and amino acid sequences of the indicated mutants.

Table S1. **Primers and templates used for chimera construction**

| Name                                                          | Fragment 1                                  |                                          | Fragment 2                                   |                                        | Template   |            |
|---------------------------------------------------------------|---------------------------------------------|------------------------------------------|----------------------------------------------|----------------------------------------|------------|------------|
|                                                               | Forward primer (5'–3')                      | Reverse primer (5'–3')                   | Forward primer (5'–3')                       | Reverse primer (5'–3')                 | Fragment 1 | Fragment 2 |
| Mut4                                                          | GAATTCTATGGACCTCAA<br>GGAGAGC               | CCCGTGCAATTTAGTGCAGT<br>TGCGGAAGATCTGGET | ATCCAGATCTTCGCC<br>AACCGCACTAAA<br>TTGCACGGG | GGATCCTCAGCA<br>GGCAATCTCCTC           | ASIC2a     | Mut3       |
| Mut for Mut6<br>(39T140 in ASIC2a to<br>79AGGSFQ84 in ASIC2b) | GAATTCTATGGACCTCAA<br>GGAGAGC               | CTGGAAGAGCCTCCCGC<br>CAGCGGCCATACAGAA    | TTCGTGTATGGGCCG<br>CTGGCGGGAGGC<br>TCTTTCCAG | GGATCCTCAGCA<br>GGCAATCTCCTC           | ASIC2a     | Mut3       |
| Mut S1                                                        | ATGGTACCATGAGCC<br>GGAGCGGCGGAGCCC<br>GGCTG | GCCATGGAGAGTAGAGGT<br>AGCTGCCGCCACCGCCGC | GCGCGGTGGCGGCA<br>GCTACCTCTACTCTCCAT<br>GGC  | ATTGGATCC<br>TCAGCAGGCAAT<br>CTCCTCCAG | ASIC2b     | ASIC2a     |
| Mut S2                                                        | ATGGTACCATGAGCC<br>GGAGCGGCGGAG<br>CCCGGCTG | GCCATGGAGAGTAGAGGT<br>ACTCAGGGACGGCCGCC  | GGCGGCGCTCCCTG<br>AGTACCTCTACTCTC<br>CATGGC  | ATTGGATCC<br>TCAGCAGGCAAT<br>CTCCTCCAG | ASIC2b     | ASIC2a     |

Table S2. Primers and templates used for mutagenesis

| Name       | Sense (5'-3')                   | Antisense (5'-3')                  | Template              |
|------------|---------------------------------|------------------------------------|-----------------------|
| Mut5       | ACATCTTCGTGTATGGGCCGCTGACCATCCG | GGCGGATGCCATGGAGTTTAGAGGTGTTGGCGAA | ASIC2a                |
| Mut6       | TTCGCCAACACCTCTAACTCCATGGC      | GATCTGGATGDGGAAGGTTGCAGGC          | Mut for Mut6          |
| Mut7       |                                 |                                    |                       |
| T25A       | ATCCGCCACATCTTCGTGLATGGGCCG     | GCCATGGAGAGCAGAGGLGTTGGCGAAGAT     | ASIC2a                |
| T39A, I40A | TATGGGCCGCTGGCCGCCCGGCGTGTGCTT  | ACACGAAGATGTGGCGGATGCCATGG         | ASIC2a T25A           |
| Mut8       |                                 |                                    |                       |
| K65T       | GCGGCACATGTGCGCGG               | AGCCCGTGAATGTAGTGCGACTC            | Mut2                  |
| 80-83 del. | TGGGCAGTGGCCFLCGLGGGATCTCTGG    | AAGCACCCGOCGTGCGCCGCCGLG           | Mut2 K65T             |
| A79T, Q84I | GGCCTTCGTGGGATCTCTGGCCCTGCTGCT  | ACTGCCAAAGCACCCGCCGATCGTCGCCGTGCGC | Mut2 K65T, 80-83 del. |
| Mut9       | TGAGCGCTGACTATCAAGCGGGCACT      | TAGGAGAAGATGTGGCAAGACCGTGCAGC      | ASIC1a                |
| Mut 10     | GGTCTTGCCACATCTTCTCTATGAGC      | GTGCAGCGTGCAGCTGTTGGC              | ASIC1a S23N           |
| Mut S3     | TGGCATCCGCCACATCTTCGTGTATG      | TGGAGTTTAGTGCGGTTGGCGAAGATC        | Mut5                  |
| Mut S4     | CAGCGCGGGTGTCTTGG               | CGCCAGCGGCCATACAC                  | Mut6                  |

Table S3. Primers and templates used for ASIC2a-Mut3-ASIC2a concatemer

| Name                    | Sequence (5'-3')                                         | Template |
|-------------------------|----------------------------------------------------------|----------|
| Mut 3- ASIC2a insertion |                                                          |          |
| Fragment 1              |                                                          | Mut3     |
| Forward primer          | ATGGTACCATGAGCCGGAGCGGCGGAGCCCGGCTG                      |          |
| Reverse primer          | CTGTTGTTGCTGCTGTTGCTGATTGCAGGCAATCTCCTCCAGGGTGCC         |          |
| Fragment 2              |                                                          | ASIC2a   |
| Forward primer          | AATCAGCAACAGCAGCAACAACAGATGGACCTCAAGGAGAGCCCCAGC         |          |
| Reverse primer          | ATTGGATCCTCAGCAGGCAATCTCCTCCAG                           |          |
| ASIC2a insertion        |                                                          | ASIC2a   |
| Sense                   | ATTACTCGAGATGGACCTCAAGGAGAGCCCCAGCGAGGGCAGC              |          |
| Antisense               | ATGGTACCCTGTTGTTGCTGCTGTTGCTGATTTACAGCAGGCAATCTCCTCCAGGG |          |
